# Supplementary material for: Nutrition, Meal Regularity and Quality of Life in Inflammatory Bowel Disease
Source: Research Square preprint supplement (doi:10.21203/rs.3.rs-8579055/v1), 2026-02-10
Supplement: Supplementary file 1 [file 652622c8c92e0fccaea81d38.docx]

**SUPPLEMENTARY MATERIALS**

Table 1: Descriptive Statistics of Patients' Age and Anthropometric Measurements

| **Variables** | **n or**  **Median (Min-Max)** | **% or**  **Mean±SD** |
| --- | --- | --- |
| **Age (years)** | 39,5 (19,0-71,0) | 39,5±13,49 |
| **Heights (m)** | 1,70 (1,55-1,90) | 1,69±0,08 |
| **Body Weight (kg)** | 70,0 (41,0-108,0) | 70,94±14,76 |
| **BMI (kg / m2)** | 24,24 (16,02-42,19) | 24,82±5,39 |
| Underweight (< 18,5 kg / m2) | 5 | 10,0 |
| Normal weight (18,5 – 24,9 kg / m2) | 23 | 46,0 |
| Overweight (25,0 – 29,9 kg / m2) | 13 | 26,0 |
| Obese (≥ 30 kg / m2) | 9 | 18,0 |

**n= Number, %= Percentage, Min= Minimum, Max= Maximum, SD = Standard Deviation**

The minimum age of the participants was 19 years, the maximum age was 71 years, with a median age of 39.5 years. The average age was also 39.5 years (SD=13.49). The average height of the participants was 1.69 meters (min=1.55, max=1.90, median=1.70), the average body weight was 70.94 kg (min=41.0, max=108.0, median=70.0), and the average BMI was 24.82 (min=16.02, max=42.19, median=24.24). It was determined that 10.0% (n=5) of the participants were underweight, 46.0% (n=23) were normal weight, 26.0% (n=13) were overweight, and 18.0% (n=9) were obese (SupplementaryTable 1).

Table 2: Descriptive Characteristics of IBD Patients

| **Variables** | **IBD Diagnosis** | |  | |
| --- | --- | --- | --- | --- |
|  | **Crohn's Disease (n=30)** | **Ulcerative Colitis (n=20)** | | **p** | |
| **Gender** |  |  | |  | |
| Female | 10 (33,3) | 11 (55) | | 0.128a | |
| Male | 20 (66,7) | 9 (45) | |
| **Type of Chronic Disease*** |  |  | |  | |
| None | 15 (42,9) | 13 (56,5) | | **-** | |
| Cardiovascular diseases | 1 (2,9) | 1 (4,3) | |
| Diabetes | - | 1 (4,3) | |
| Hypertension | 3 (8,6) | - | |
| Cancer | 1 (2,9) | - | |
| Endocrine diseases | 1 (2,9) | 2 (8,7) | |
| Musculoskeletal problems | 5 (14,3) | 1 (4,3) | |
| Respiratory system diseases | 2 (5,7) | 1 (4,3) | |
| Gastrointestinal system diseases | 3 (8,6) | 4 (17,4) | |
| Other | 4 (11,5) | - | |  | |
| **IBD Diagnosis Duration** |  |  | | 0.280b | |
| Less than 1 year | 0 (0) | 2 (10) | |
| 1-3 years | 6 (20) | 2 (10) | |
| 3-5 years | 9 (30) | 6 (30) | |
| 5-10 years | 7 (23,3) | 7 (35) | |
| More than 10 years | 8 (26,7) | 3 (15) | |
| **Has the patient received nutrition education?** |  |  | |  | |
| Yes | 7 (23,3) | 3 (15) | | 0.470b | |
| No | 23 (76,7) | 17 (85) | |  | |
| **Where did the patient receive nutrition education?** |  |  | |  | |
| No | 23 (76,7) | 17 (85) | | 0.388b | |
| Dietitian | 5 (16,7) | 1 (5) | |
| Physician | 2 (6,7) | 1 (5) | |
| Media | 0 (0) | 1 (5) | |
| **Is the patient following a specific diet?** |  |  | |  | |
| Yes | 2 (6,7) | 0 (0) | | 0.239b | |
| No | 28 (93,3) | 20 (100) | |
| **If following a diet, what type?** |  |  | |  | |
| None | 28 (93,3) | 20 (100) | | 0.499b | |
| Protein-based | 1 (3,3) | 0 (0) | |
| Gluten-free | 1 (3,3) | 0 (0) | |
| **Is the patient using any vitamins or minerals?** |  |  | |  | |
| Yes | 14 (46,7) | 11 (55) | | 0.564b | |
| No | 16 (53,3) | 9 (45) | |
| **If using vitamins or minerals, which ones?*** |  |  | |  | |
| No | 18 (47,4) | 7 (28,0) | | - | |
| Vitamin D | 10 (26,39 | 8 (32,0) | |
| Vitamin B12 | 2 (5,3) | 3 (12,0) | |
| Vitamin C | 1 (2,6) | - | |
| Folic acid | 1 (2,6) | - | |
| Iron | 3 (7,9) | 5 (20,0) | |
| Magnesium | - | 1 (4,0) | |
| Calcium | 2 (5,3) | - | |
| Multivitamin | 1 (2,6) | 1 (4,0) | |
| **Beck Depression Inventory Scoring** |  |  | |  | |
| Minimal | 22 (73,3) | 17 (85) | | 0.442b | |
| Mild | 6 (20) | 1 (5) | |
| Moderate | 2 (6,7) | 2 (10) | |

**a = Pearson Chi-Square test, b = Fisher’s Exact test, p < 0.05. *Since responses allowed for multiple answers, only n (%) values are provided.**

Among the 50 IBD patients, including 20 UC and 30 with CD, 42.0% (n=21) were female, and 58.0% (n=29) were male. It was found that 44.0% (n=22) of the participants had a chronic illness other than IBD. The majority of the participants, 30.0% (n=15), had a diagnosis duration of 3-5 years. Additionally, 20.0% (n=10) of the participants received nutrition education, 12.0% (n=6) received education from a dietitian, 4.0% (n=2) were on a specific diet, and 2.0% (n=1) followed a protein-heavy or gluten-free diet. Furthermore, 50.0% (n=25) reported using vitamin and mineral supplements, with the most commonly used being Vitamin D (28.6%, n=18), iron (12.7%, n=8), and Vitamin B12 (7.9%, n=5) (SupplementaryTable 2).

Table 3: Evaluation of Meal Skipping in Relation to IBD Diagnosis

| **Variables** | **IBD Diagnosis** | |  |
| --- | --- | --- | --- |
|  | **Crohn's Disease (n=30)** | **Ulcerative Colitis (n=20)** | **p** |
| **Number of Main Meals** |  |  |  |
| 1 meal | 1 (3,3) | 0 (0) | 1.000b |
| 2 meals | 11 (36,7) | 7 (35) |
| 3 meals | 18 (60) | 13 (65) |
| **Number of Snacks** |  |  |  |
| None | 15 (50) | 4 (20) | 0.081b |
| 1 meal | 11 (36,7) | 11 (55) |
| 2 meals | 3 (10) | 5 (25) |
| 3 meals | 1 (3,3) | 0 (0) |
| **Is a Meal Skipped?** |  |  |  |
| Yes | 12 (40) | 4 (20) | 0.240a |
| No | 8 (26,7) | 4 (20) |
| Sometimes | 10 (33,3) | 12 (60) |
| **Which Meal is Skipped?** |  |  |  |
| None | 8 (26,7) | 4 (20) | 0.674b |
| Breakfast | 6 (20) | 3 (15) |
| Lunch | 15 (50) | 13 (65) |
| Dinner | 1 (3,3) | 0 (0) |
| **Reason for Skipping Meals** |  |  |  |
| No meal skipped | 8 (26,7) | 4 (20) | 0.704b |
| Time constraints | 14 (46,7) | 12 (60) |
| Lack of appetite | 3 (10) | 1 (5) |
| Not a habit | 1 (3,3) | 1 (5) |
| Due to snacking | 0 (0) | 1 (5) |
| Due to symptoms | 4 (13,3) | 1 (5) |
| **Do Symptoms Affect the Number of Meals?** |  |  |  |
| Yes | 13 (43,3) | 9 (45) | 0.907a |
| No | 17 (56,7) | 11 (55) |

**a=Pearson Chi-Square test, b=Fisher’s Exact test, p<0.05**

It was found that 62.0% (n=31) of the patients consumed three main meals, 44.0% (n=22) had one snack, 42.0% occasionally skipped meals, 56.0% (n=28) skipped the lunch meal, and 52.0% (n=26) skipped meals due to time constraints. Additionally, 44.0% (n=22) reported that their symptoms affected their meal frequency (SupplementaryTable 3).
